# Supplementary material for: Enhanced piezoresistive performance of 3C-SiC nanowires by coupling with ultraviolet illumination
Source: Royal Society of Chemistry journal article supplement (doi:10.1039/c9tc04116h), 2019-01-01
Supplement: c9tc04116h1.pdf [file c9tc04116h1.pdf]

**Electronic Supplementary Information**

**Enhanced Piezoresistive Performance of 3C-SiC Nanowires by Coupling  
Ultraviolet Illumination**

*Xiaoxiao Li, Fengmei Gao, Lin Wang, Lan Jiang, Shanliang Chen\* and Weiyang Yang\**

Institute of Materials, Ningbo University of Technology, Ningbo, 315016, P. R. China

***Corresponding Authors:***

***E-mail:*** [csl211.kd@163.com](mailto:csl211.kd@163.com) (S. Chen) and [weiyang@tsinghua.org.cn](mailto:weiyang@tsinghua.org.cn) (W. Yang)

***Tel:*** +86-574-87080966, ***Fax:*** +86-574-87081221

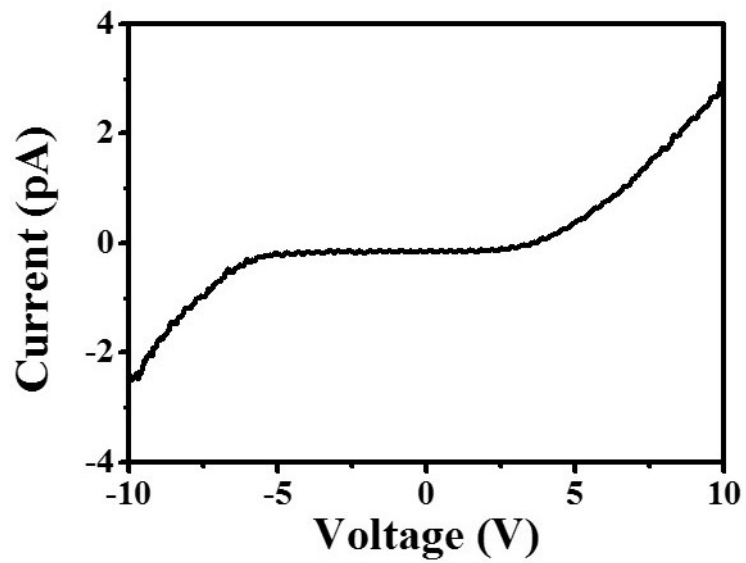

**Fig. S1** The  $I$ - $V$  curve of single SiC nanowire under the pressure of 0 nN in dark condition.
